# Supplementary material for: An injectable double-crosslinking iodinated composite hydrogel as a potential radioprotective spacer with durable imaging function
Source: Royal Society of Chemistry journal article supplement (doi:10.1039/d0tb02953j), 2021-01-01
Supplement: d0tb02953j1.pdf [file d0tb02953j1.pdf]

## Supplementary information

### **An injectable double-crosslinking iodinated composite hydrogel as a potential radioprotective spacer with durable imaging function**

Cheng Wang<sup>a,1</sup>, Lingyun Wu<sup>b,1</sup>, Wenxiang Li<sup>b</sup>, Junhao Fei<sup>a</sup>, Jiaqi Xu<sup>b</sup>, Si Chen<sup>a,\*</sup>,  
Senxiang Yan<sup>b,\*</sup>, and Xu Wang<sup>a,\*</sup>

*<sup>a</sup> College of Materials Science & Engineering, Zhejiang University of Technology, Hangzhou 310014, P. R. China.*

*E-mail: [chensi@zjut.edu.cn](mailto:chensi@zjut.edu.cn)*

*<sup>b</sup> The First Affiliated Hospital, Zhejiang University School of Medicine, Hangzhou 310003, P. R. China.*

*Email: [yansenxiang@zju.edu.cn](mailto:yansenxiang@zju.edu.cn)*

<sup>1</sup> These authors contributed equally to this work.

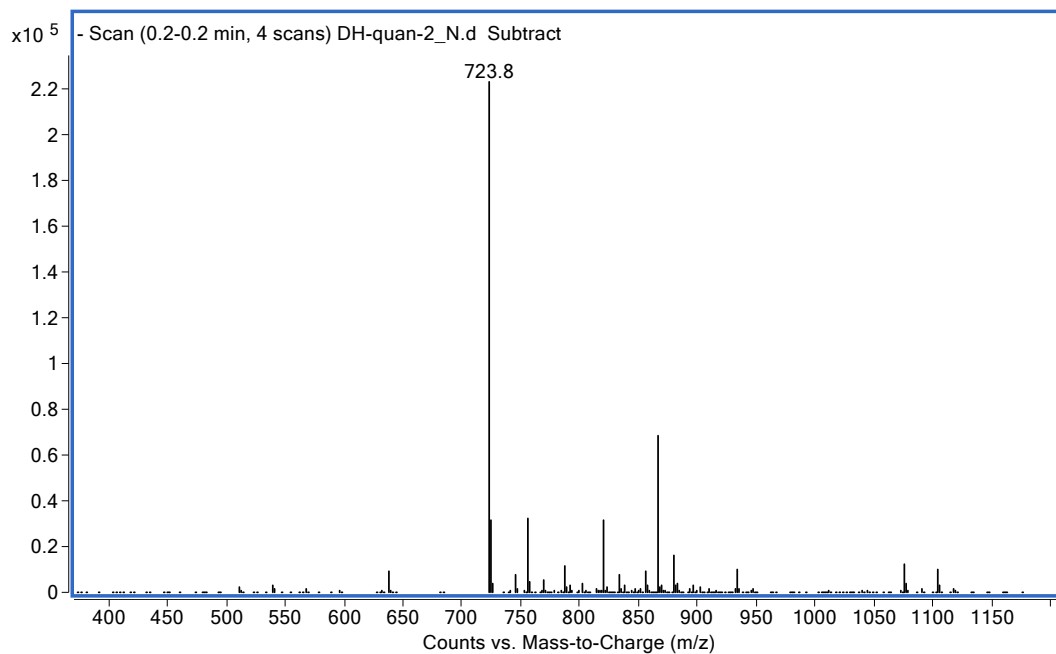

Figure S1. The mass spectrum of DHQ

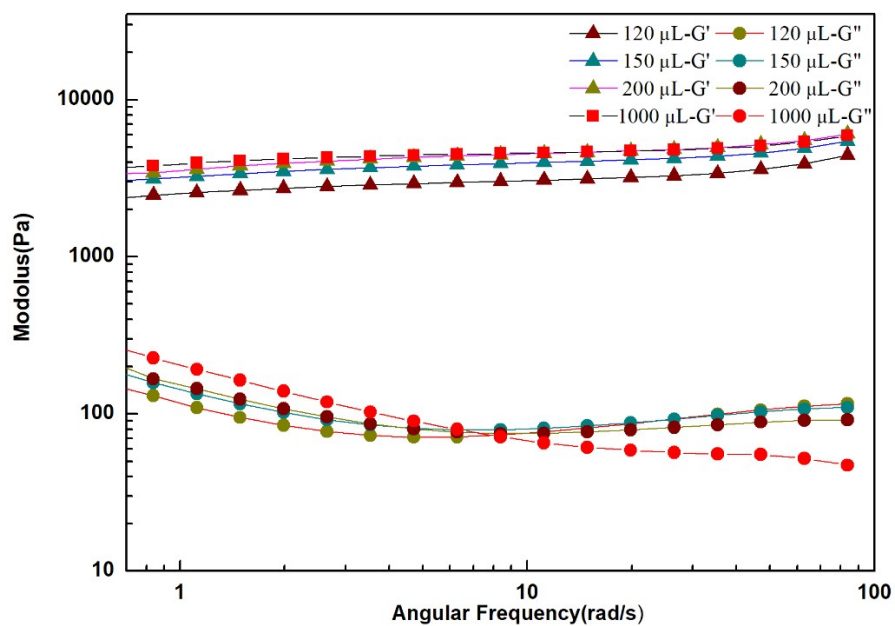

Figure S2. Rheology of the hydrogels in different crosslinking agent (CMC was fixed at 1 mL)

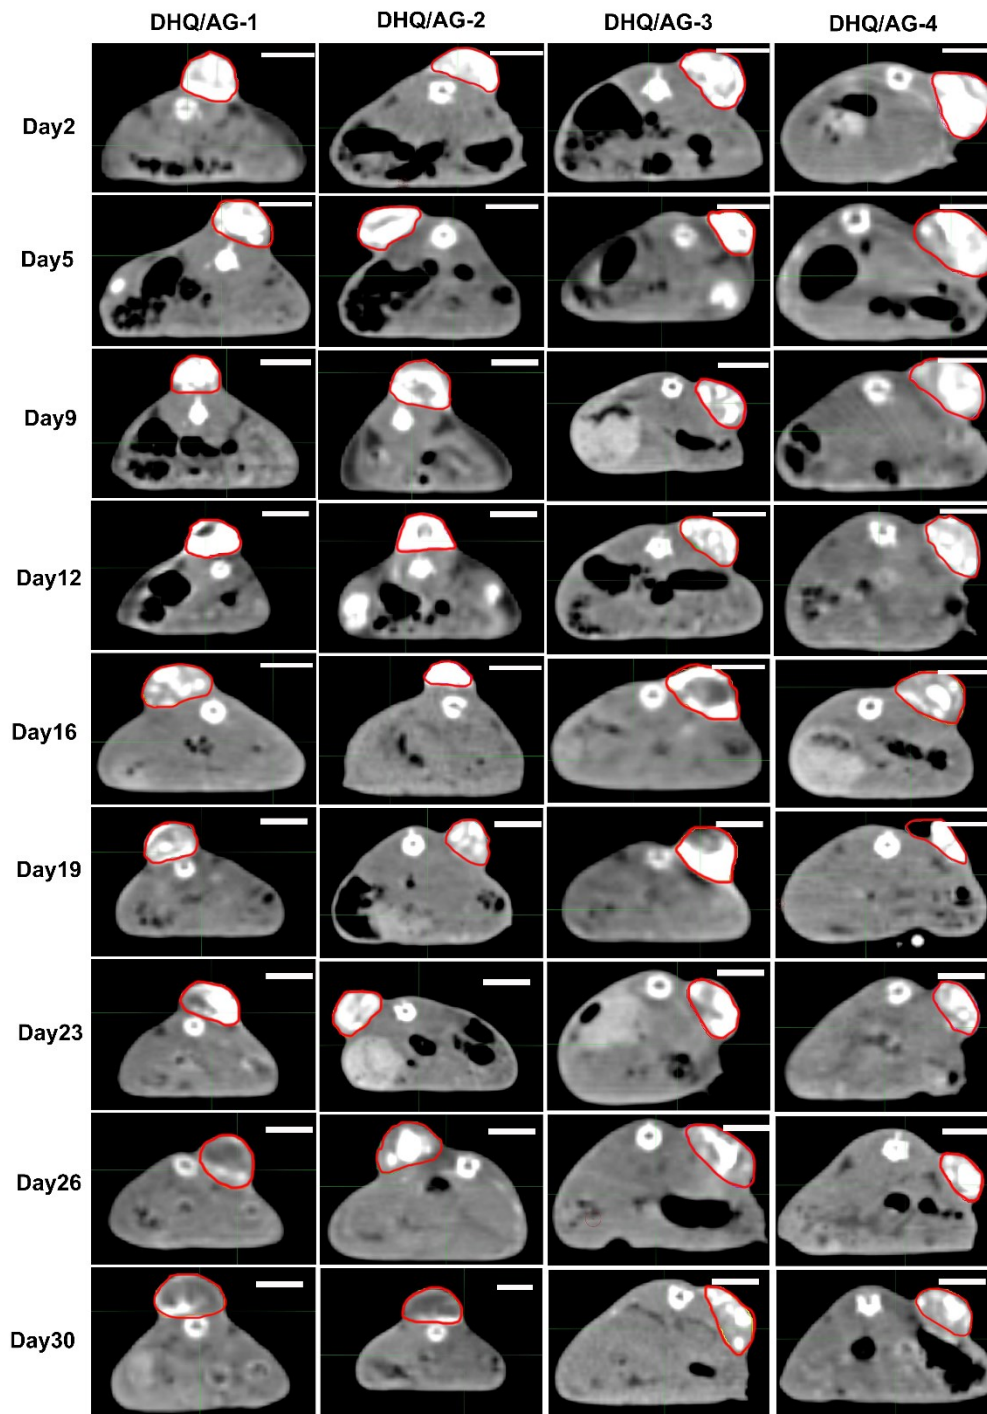

Figure S3. CT images of the hydrogels at each time point (scale bar = 3 cm).
